# Supplementary material for: Coordination-bond-driven fabrication of crack-free photonic crystals
Source: Royal Society of Chemistry journal article supplement (doi:10.1039/c6tc01792d), 2016-01-01
Supplement: c6tc01792d1.pdf [file c6tc01792d1.pdf]

## Supporting Information

### Coordination-Bond-Driven Fabrication of Crack-Free Photonic Crystals

X. D. Shi<sup>a\*</sup>, W. Y. Liu<sup>a</sup>, D. Zhao<sup>a</sup>, X. T. Li<sup>a</sup>, R. M. Dou<sup>c\*</sup>, K. J. Shea<sup>d</sup>, X. H. Lu<sup>a,b\*</sup>

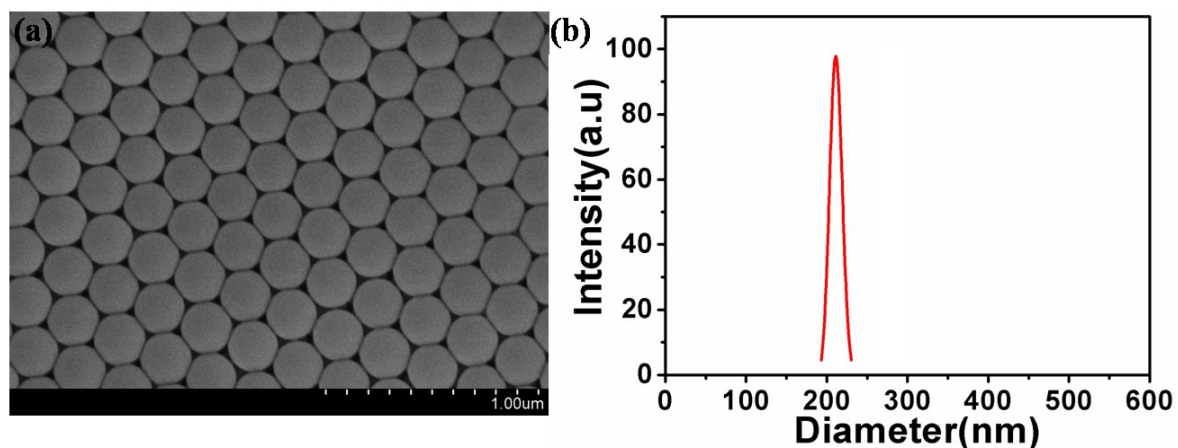

**Figure S1** The characterization of as prepared latex spheres' diameter (a) and size distribution (b), whose PDI is lower than 0.005.

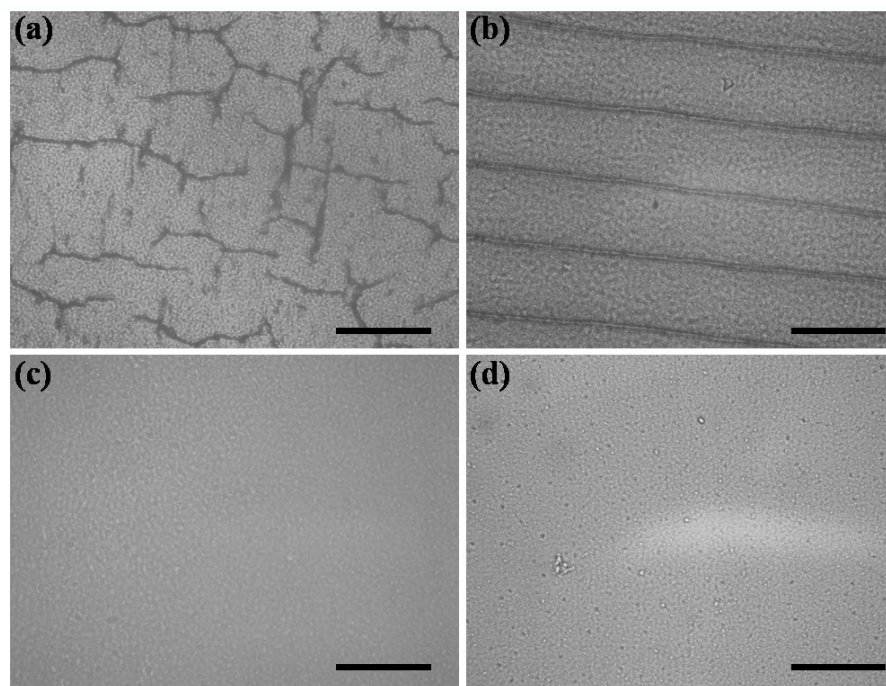

**Figure S2** The optical microscopy images of as prepared PCs films. Mass ratios of zirconium ammonium carbonate to polymer latex spheres were 0:100, 0.5:100, 1:100 and 2:100 (a-d), scale bar is 500 μm.
